# Supplementary material for: Escherichia ruysiae sp. nov., a novel Gram-stain-negative bacterium, isolated from a faecal sample of an international traveller
Source: PubMed Central journal article supplement (PMC8346766; doi:10.1099/ijsem.0.004609), 2021-01-06
Supplement: ijsem-71-609-s001.pdf [file ijsem-71-609-s001.pdf]

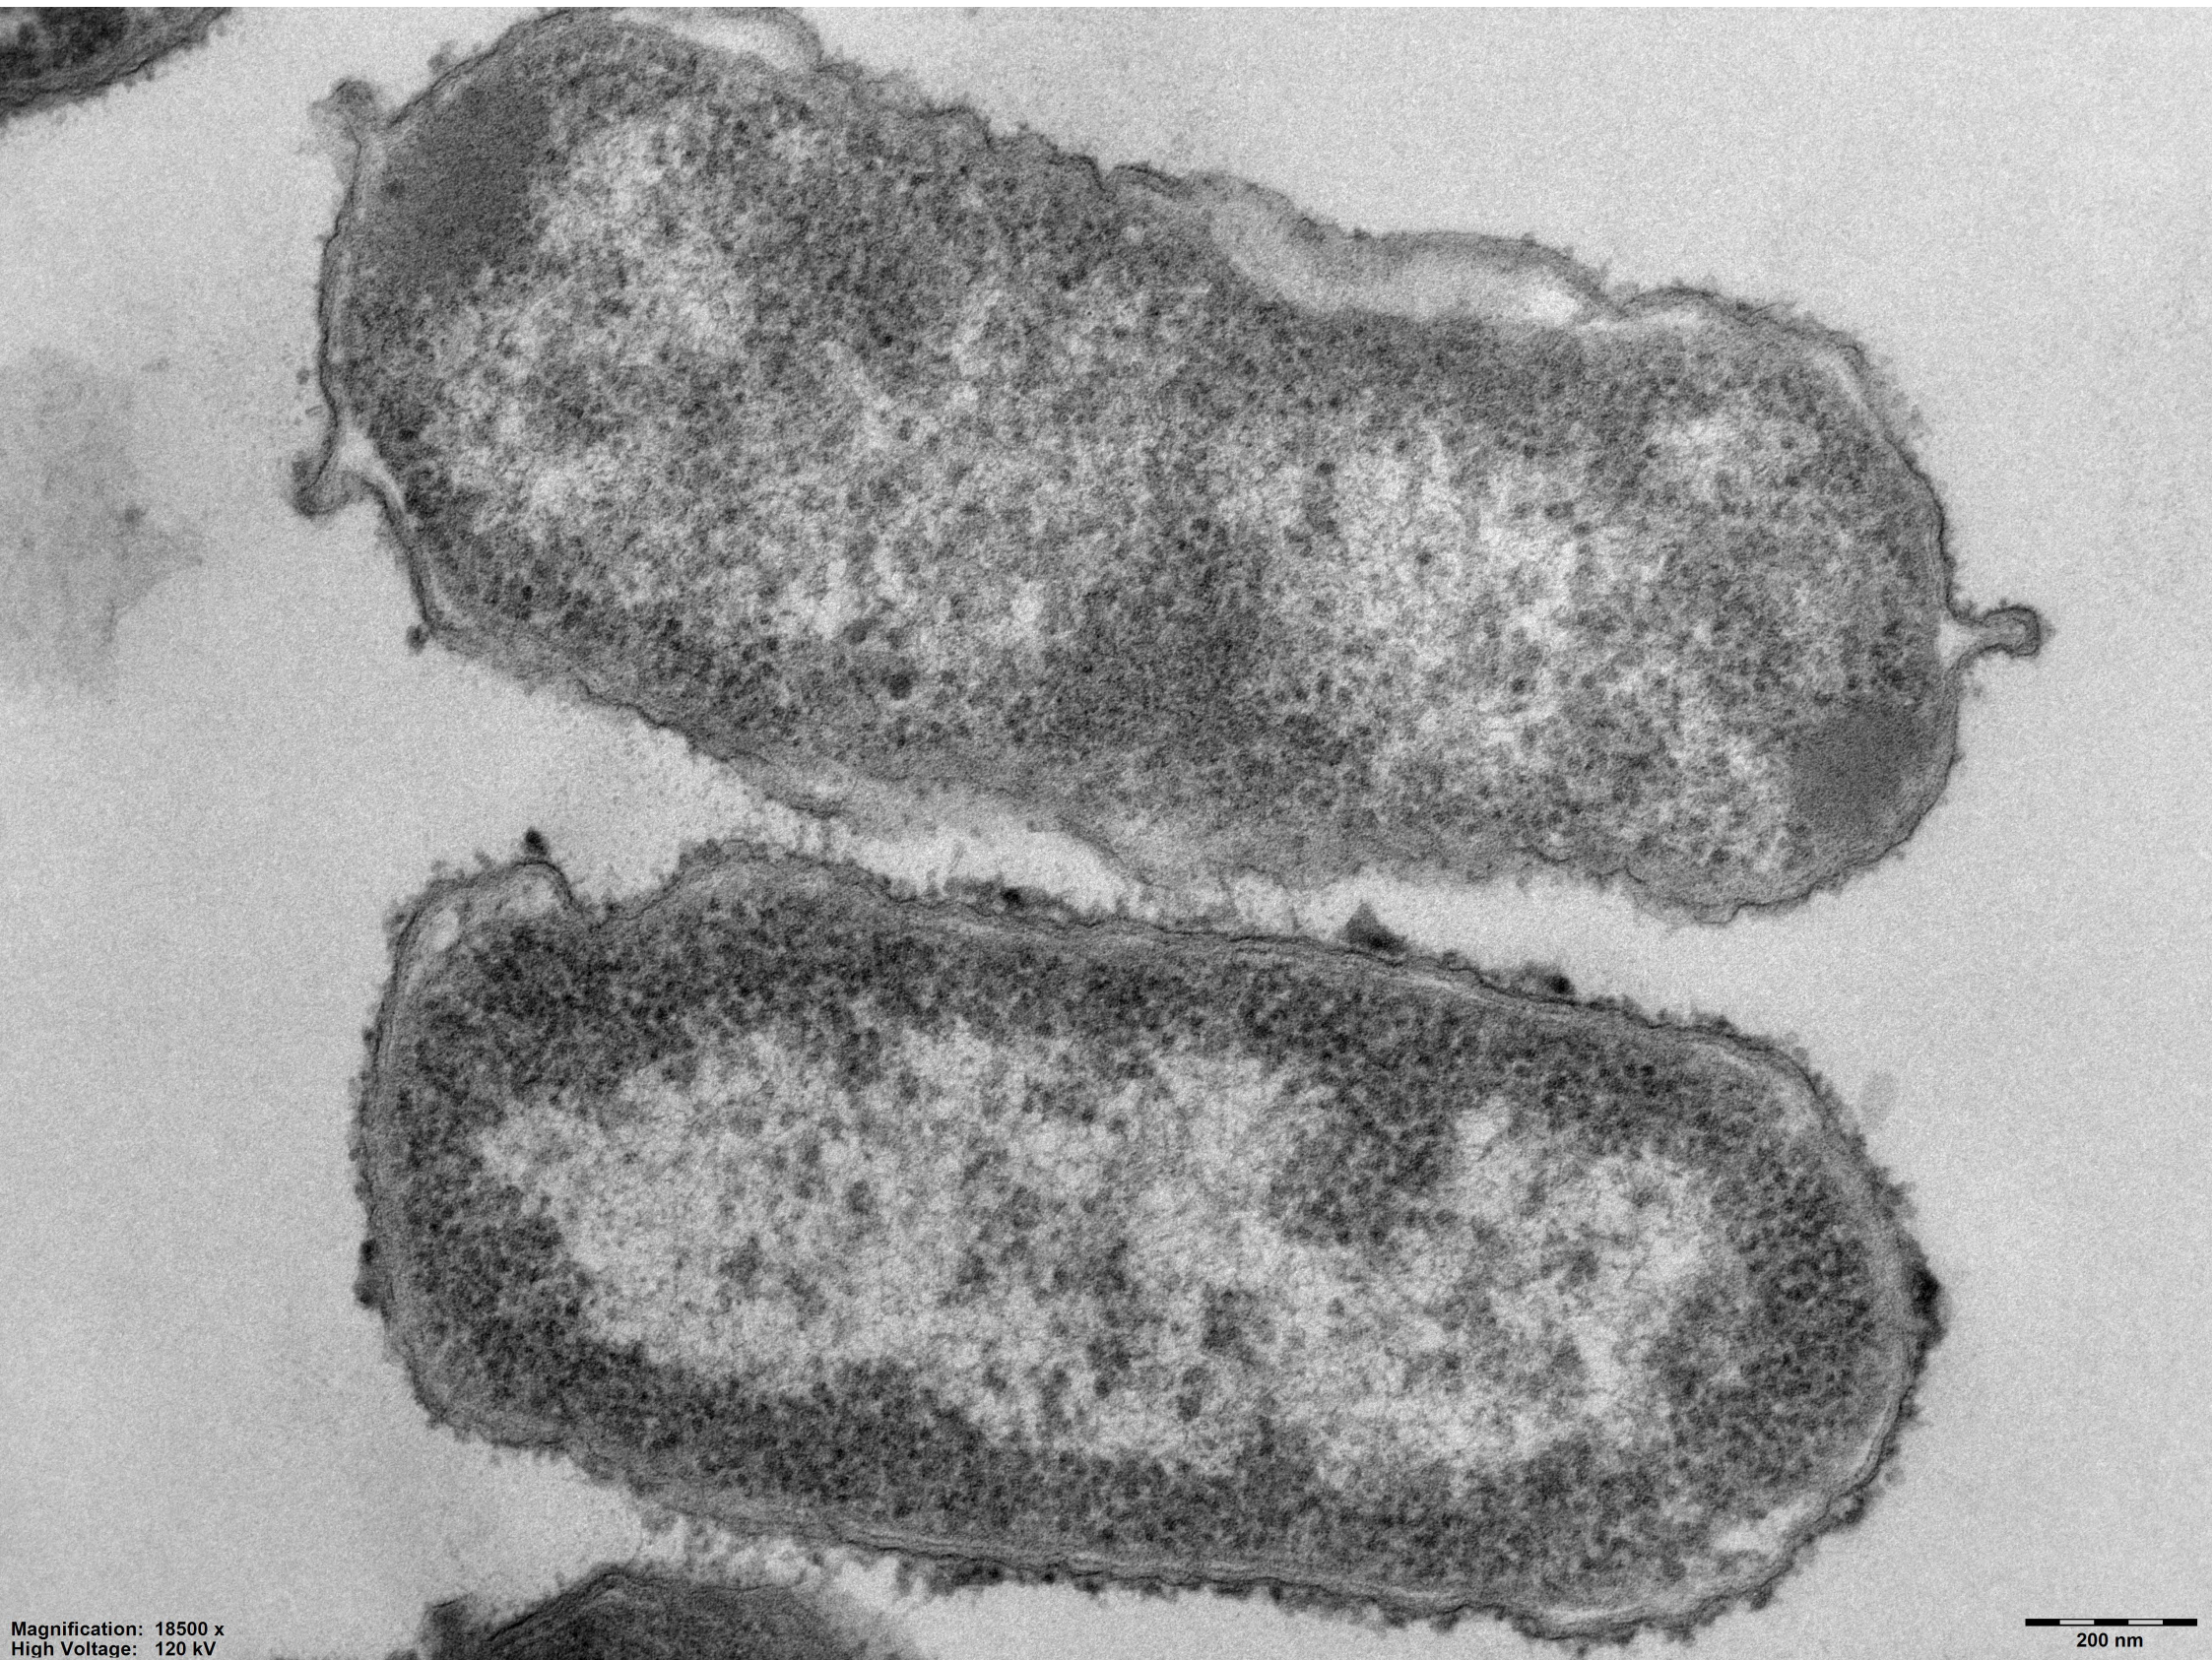

Figure S1. Transmission electron micrograph of *E. ruysiae* str. OPT1704T at a magnification of 18,500 $\times$

Comment 1

Comment 2

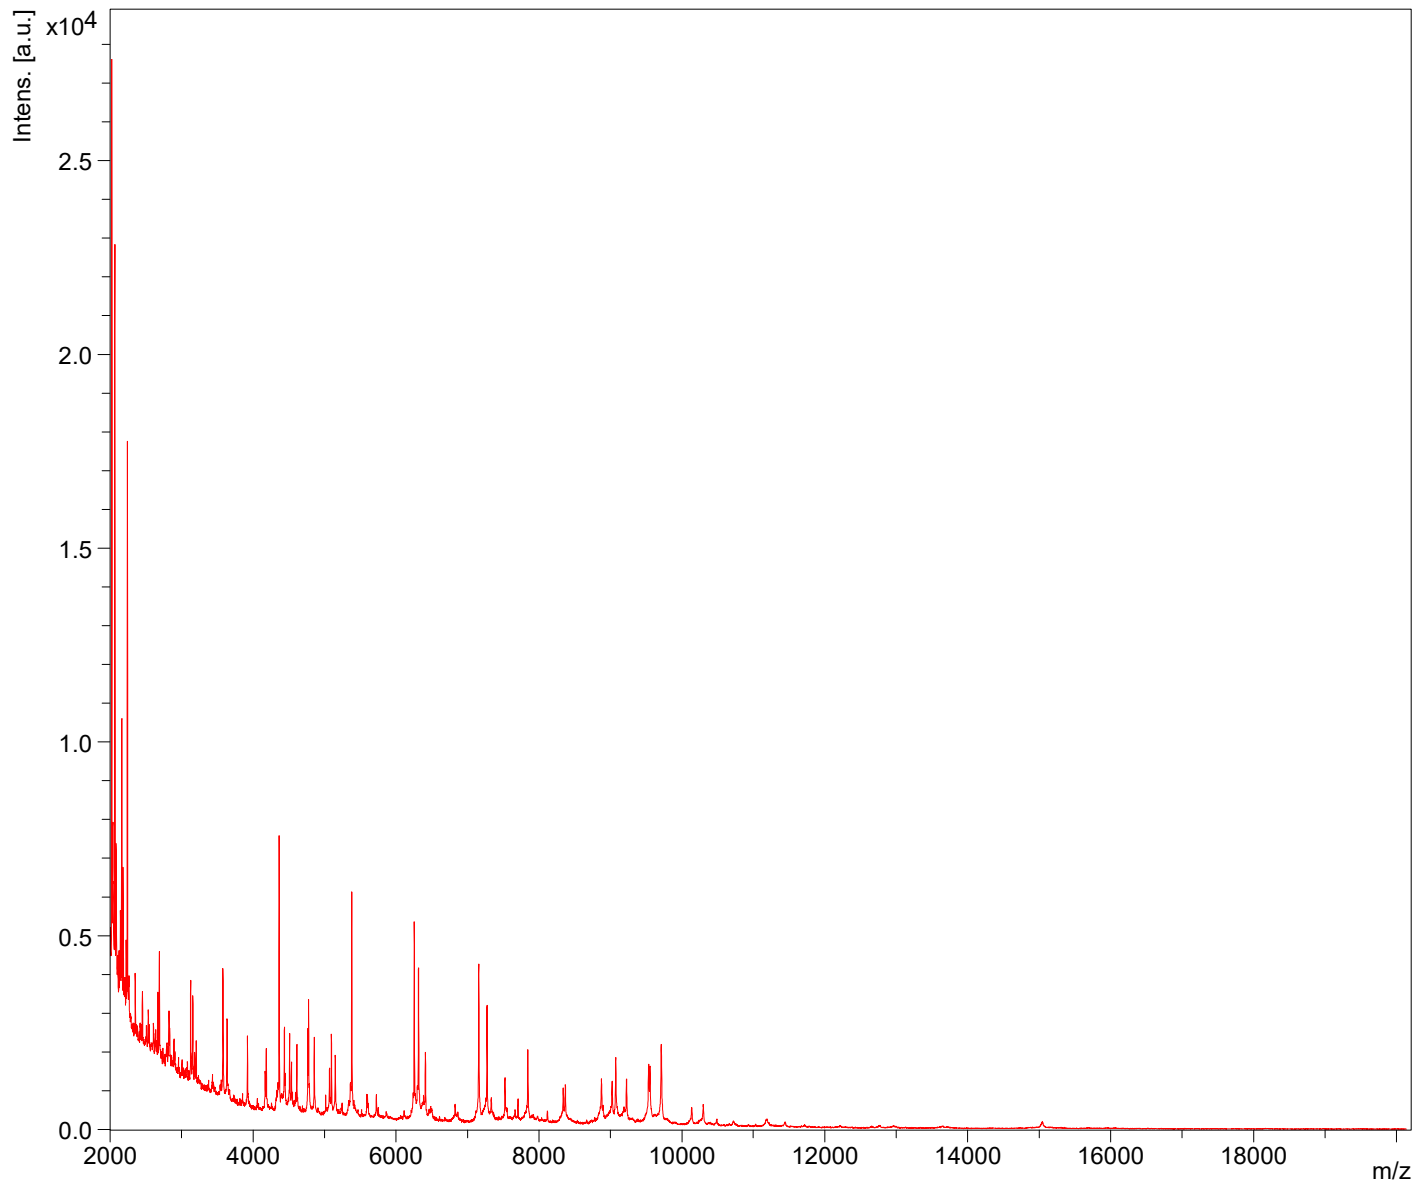

**Acquisition Parameter**

Date of acquisition 2019-03-06T12:06:57.024+01:00  
Acquisition method name D:\Methods\flexControlMethods\MBT\_FC.par  
Aquisition operation mode Linear  
Voltage polarity POS  
Number of shots 200  
Name of spectrum used for calibration  
Calibration reference list used MBT\_Standard

**Instrument Info**

User BDAL@DE  
Instrument 10-020-8837  
Instrument type microflex

Full length 16S rRNA gene alignment used for figure 1 and table 2.

E. albertii 1 TTGAAGAGTTTGGATCATGGCTCAGATTGAACGCTGGCGGCAGGCCCTAACACATGCAAGTCGAACGGTAACAGGAAACAGC  
 E. coli 1 TTGAAGAGTTTGGATCATGGCTCAGATTGAACGCTGGCGGCAGGCCCTAACACATGCAAGTCGAACGGTAACAGGAAAGCAGC  
 E. fergusonii 1 TTGAAGAGTTTGGATCATGGCTCAGATTGAACGCTGGCGGCAGGCCCTAACACATGCAAGTCGAACGGTAACAGGAAATCAGC  
 E. hermannii 1 TTGAAGAGTTTGGATCATGGCTCAGATTGAACGCTGGCGGCAGGCCCTAACACATGCAAGTCGAACGGTAACAGGAAAGCAGC  
 E. marmotae 1 TTGAAGAGTTTGGATCATGGCTCAGATTGAACGCTGGCGGCAGGCCCTAACACATGCAAGTCGAACGGTAACAGGAAACAGC  
 E. ruysiae 1 TTGAAGAGTTTGGATCATGGCTCAGATTGAACGCTGGCGGCAGGCCCTAACACATGCAAGTCGAACGGTAACAGGAAACAGC  
 Cryptic clade I 1 TTGAAGAGTTTGGATCATGGCTCAGATTGAACGCTGGCGGCAGGCCCTAACACATGCAAGTCGAACGGTAACAGGAAATCAGC  
 Cryptic clade II 1 TTGAAGAGTTTGGATCATGGCTCAGATTGAACGCTGGCGGCAGGCCCTAACACATGCAAGTCGAACGGTAACAGGAAAGCAGC  
 Cryptic clade III 1 TTGAAGAGTTTGGATCATGGCTCAGATTGAACGCTGGCGGCAGGCCCTAACACATGCAAGTCGAACGGTAACAGGAAATCAGC  
 Cryptic clade VI 1 TTGAAGAGTTTGGATCATGGCTCAGATTGAACGCTGGCGGCAGGCCCTAACACATGCAAGTCGAACGGTAACAGGAAAGCAGC  
 S. enterica 1 TTGAAGAGTTTGGATCATGGCTCAGATTGAACGCTGGCGGCAGGCCCTAACACATGCAAGTCGAACGGTAACAGGAAAGCAGC

E. albertii 81 TTGCTGTTTCGCTGACGAGTGGCGGACGGGTGAGTAATGTCTGGGAAACTGCCCGATGGAGGGGGATAAATACTGGA AAC  
 E. coli 81 TTGCTGCTTTCGCTGACGAGTGGCGGACGGGTGAGTAATGTCTGGGAAACTGCCCGATGGAGGGGGATAAATACTGGA AAC  
 E. fergusonii 81 TTGCTGATTTCGCTGACGAGTGGCGGACGGGTGAGTAATGTCTGGGAAACTGCCCGATGGAGGGGGATAAATACTGGA AAC  
 E. hermannii 81 TTGCTGCTTCGCTGACGAGTGGCGGACGGGTGAGTAATGTCTGGGAAACTGCCCGATGGAGGGGGATAAATACTGGA AAC  
 E. marmotae 81 TTGCTTCTTTCGCTGACGAGTGGCGGACGGGTGAGTAATGTCTGGGAAACTGCCCGATGGAGGGGGATAAATACTGGA AAC  
 E. ruysiae 81 TTGCTGTTTCGCTGACGAGTGGCGGACGGGTGAGTAATGTCTGGGAAACTGCCCGATGGAGGGGGATAAATACTGGA AAC  
 Cryptic clade I 81 TTGCTGATTTCGCTGACGAGTGGCGGACGGGTGAGTAATGTCTGGGAAACTGCCCGATGGAGGGGGATAAATACTGGA AAC  
 Cryptic clade II 81 TTGCTTCTTTCGCTGACGAGTGGCGGACGGGTGAGTAATGTCTGGGAAACTGCCCGATGGAGGGGGATAAATACTGGA AAC  
 Cryptic clade III 81 TTGCTGATTTCGCTGACGAGTGGCGGACGGGTGAGTAATGTCTGGGAAACTGCCCGATGGAGGGGGATAAATACTGGA AAC  
 Cryptic clade VI 81 TTGCTGCTTTCGCTGACGAGTGGCGGACGGGTGAGTAATGTCTGGGAAACTGCCCGATGGAGGGGGATAAATACTGGA AAC  
 S. enterica 81 TTGCTGCTTTCGCTGACGAGTGGCGGACGGGTGAGTAATGTCTGGGAAACTGCCCGATGGAGGGGGATAAATACTGGA AAC

E. albertii 161 GGTAGCTAATACCGCATAACGTCGCAAGACCAAAGAGGGGGACCTTAGGGCCCTCTTGCCATCGGATGTGCCAGATGGGA  
 E. coli 161 GGTAGCTAATACCGCATAACGTCGCAAGACCAAAGAGGGGGACCTTAGGGCCCTCTTGCCATCGGATGTGCCAGATGGGA  
 E. fergusonii 161 GGTAGCTAATACCGCATAACGTCGCAAGACCAAAGAGGGGGACCTTAGGGCCCTCTTGCCATCGGATGTGCCAGATGGGA  
 E. hermannii 161 GGTAGCTAATACCGCATAACGTCGCAAGACCAAAGAGGGGGACCTTAGGGCCCTCTTGCCATCGGATGTGCCAGATGGGA  
 E. marmotae 161 GGTAGCTAATACCGCATAACGTCGCAAGACCAAAGAGGGGGACCTTAGGGCCCTCTTGCCATCGGATGTGCCAGATGGGA  
 E. ruysiae 161 GGTAGCTAATACCGCATAACGTCGCAAGACCAAAGAGGGGGACCTTAGGGCCCTCTTGCCATCGGATGTGCCAGATGGGA  
 Cryptic clade I 161 GGTAGCTAATACCGCATAACGTCGCAAGACCAAAGAGGGGGACCTTAGGGCCCTCTTGCCATCGGATGTGCCAGATGGGA  
 Cryptic clade II 161 GGTAGCTAATACCGCATAACGTCGCAAGACCAAAGAGGGGGACCTTAGGGCCCTCTTGCCATCGGATGTGCCAGATGGGA  
 Cryptic clade III 161 GGTAGCTAATACCGCATAACGTCGCAAGACCAAAGAGGGGGACCTTAGGGCCCTCTTGCCATCGGATGTGCCAGATGGGA  
 Cryptic clade VI 161 GGTAGCTAATACCGCATAACGTCGCAAGACCAAAGAGGGGGACCTTAGGGCCCTCTTGCCATCGGATGTGCCAGATGGGA  
 S. enterica 161 GGTAGCTAATACCGCATAACGTCGCAAGACCAAAGAGGGGGACCTTAGGGCCCTCTTGCCATCGGATGTGCCAGATGGGA

E. albertii 241 TTAGCTAGTGGTGGGTAACGGCTCACCTAGGCGACGATCCCTAGCTGGTCTGAGAGGATGACCAGCCACACTGGA ACT  
 E. coli 241 TTAGCTAGTGGTGGGTAACGGCTCACCTAGGCGACGATCCCTAGCTGGTCTGAGAGGATGACCAGCCACACTGGA ACT  
 E. fergusonii 241 TTAGCTAGTGGTGGGTAACGGCTCACCTAGGCGACGATCCCTAGCTGGTCTGAGAGGATGACCAGCCACACTGGA ACT  
 E. hermannii 241 TTAGCTAGTGGTGGGTAACGGCTCACCTAGGCGACGATCCCTAGCTGGTCTGAGAGGATGACCAGCCACACTGGA ACT  
 E. marmotae 241 TTAGCTAGTGGTGGGTAACGGCTCACCTAGGCGACGATCCCTAGCTGGTCTGAGAGGATGACCAGCCACACTGGA ACT  
 E. ruysiae 241 TTAGCTAGTGGTGGGTAACGGCTCACCTAGGCGACGATCCCTAGCTGGTCTGAGAGGATGACCAGCCACACTGGA ACT  
 Cryptic clade I 241 TTAGCTAGTGGTGGGTAACGGCTCACCTAGGCGACGATCCCTAGCTGGTCTGAGAGGATGACCAGCCACACTGGA ACT  
 Cryptic clade II 241 TTAGCTAGTGGTGGGTAACGGCTCACCTAGGCGACGATCCCTAGCTGGTCTGAGAGGATGACCAGCCACACTGGA ACT  
 Cryptic clade III 241 TTAGCTAGTGGTGGGTAACGGCTCACCTAGGCGACGATCCCTAGCTGGTCTGAGAGGATGACCAGCCACACTGGA ACT  
 Cryptic clade VI 241 TTAGCTAGTGGTGGGTAACGGCTCACCTAGGCGACGATCCCTAGCTGGTCTGAGAGGATGACCAGCCACACTGGA ACT  
 S. enterica 241 TTAGCTAGTGGTGGGTAACGGCTCACCTAGGCGACGATCCCTAGCTGGTCTGAGAGGATGACCAGCCACACTGGA ACT

E. albertii 321 GAGACACGGTCCAGACTCCTACGGGAGGCAGCAGTGGGGAATATTGCACAATGGGCGCAAGCCTGATGCAGCCATGCCGC  
 E. coli 321 GAGACACGGTCCAGACTCCTACGGGAGGCAGCAGTGGGGAATATTGCACAATGGGCGCAAGCCTGATGCAGCCATGCCGC  
 E. fergusonii 321 GAGACACGGTCCAGACTCCTACGGGAGGCAGCAGTGGGGAATATTGCACAATGGGCGCAAGCCTGATGCAGCCATGCCGC  
 E. hermannii 321 GAGACACGGTCCAGACTCCTACGGGAGGCAGCAGTGGGGAATATTGCACAATGGGCGCAAGCCTGATGCAGCCATGCCGC  
 E. marmotae 321 GAGACACGGTCCAGACTCCTACGGGAGGCAGCAGTGGGGAATATTGCACAATGGGCGCAAGCCTGATGCAGCCATGCCGC  
 E. ruysiae 321 GAGACACGGTCCAGACTCCTACGGGAGGCAGCAGTGGGGAATATTGCACAATGGGCGCAAGCCTGATGCAGCCATGCCGC  
 Cryptic clade I 321 GAGACACGGTCCAGACTCCTACGGGAGGCAGCAGTGGGGAATATTGCACAATGGGCGCAAGCCTGATGCAGCCATGCCGC  
 Cryptic clade II 321 GAGACACGGTCCAGACTCCTACGGGAGGCAGCAGTGGGGAATATTGCACAATGGGCGCAAGCCTGATGCAGCCATGCCGC  
 Cryptic clade III 321 GAGACACGGTCCAGACTCCTACGGGAGGCAGCAGTGGGGAATATTGCACAATGGGCGCAAGCCTGATGCAGCCATGCCGC  
 Cryptic clade VI 321 GAGACACGGTCCAGACTCCTACGGGAGGCAGCAGTGGGGAATATTGCACAATGGGCGCAAGCCTGATGCAGCCATGCCGC  
 S. enterica 321 GAGACACGGTCCAGACTCCTACGGGAGGCAGCAGTGGGGAATATTGCACAATGGGCGCAAGCCTGATGCAGCCATGCCGC

E. albertii 401 GTGTATGAAGAAGGCCTTCGGGTTGTAAAGTACTTTTCAGCGGGGAGGAAGGGAGTAAAGTTAATACCTTTGCTCATTGAC  
 E. coli 401 GTGTATGAAGAAGGCCTTCGGGTTGTAAAGTACTTTTCAGCGGGGAGGAAGGGAGTAAAGTTAATACCTTTGCTCATTGAC  
 E. fergusonii 401 GTGTATGAAGAAGGCCTTCGGGTTGTAAAGTACTTTTCAGCGGGGAGGAAGGGAGTAAAGTTAATACCTTTGCTCATTGAC  
 E. hermannii 401 GTGTATGAAGAAGGCCTTCGGGTTGTAAAGTACTTTTCAGCGGGGAGGAAGGGAGTAAAGTTAATACCTTTGCTCATTGAC  
 E. marmotae 401 GTGTATGAAGAAGGCCTTCGGGTTGTAAAGTACTTTTCAGCGGGGAGGAAGGGAGTAAAGTTAATACCTTTGCTCATTGAC  
 E. ruysiae 401 GTGTATGAAGAAGGCCTTCGGGTTGTAAAGTACTTTTCAGCGGGGAGGAAGGGAGTAAAGTTAATACCTTTGCTCATTGAC  
 Cryptic clade I 401 GTGTATGAAGAAGGCCTTCGGGTTGTAAAGTACTTTTCAGCGGGGAGGAAGGGAGTAAAGTTAATACCTTTGCTCATTGAC  
 Cryptic clade II 401 GTGTATGAAGAAGGCCTTCGGGTTGTAAAGTACTTTTCAGCGGGGAGGAAGGGAGTAAAGTTAATACCTTTGCTCATTGAC  
 Cryptic clade III 401 GTGTATGAAGAAGGCCTTCGGGTTGTAAAGTACTTTTCAGCGGGGAGGAAGGGAGTAAAGTTAATACCTTTGCTCATTGAC  
 Cryptic clade VI 401 GTGTATGAAGAAGGCCTTCGGGTTGTAAAGTACTTTTCAGCGGGGAGGAAGGGAGTAAAGTTAATACCTTTGCTCATTGAC  
 S. enterica 401 GTGTATGAAGAAGGCCTTCGGGTTGTAAAGTACTTTTCAGCGGGGAGGAAGGGAGTAAAGTTAATACCTTTGCTCATTGAC





|                      |      |                                                                                   |
|----------------------|------|-----------------------------------------------------------------------------------|
| <i>E. albertii</i>   | 1441 | TTAACCTTCGGGAGGGCGCTTACCACCTTTGTGATTCATGACTGGGGTGAAGTCGTAACAAGGTAACCGTAGGGGAACCTG |
| <i>E. coli</i>       | 1441 | TTAACCTTCGGGAGGGCGCTTACCACCTTTGTGATTCATGACTGGGGTGAAGTCGTAACAAGGTAACCGTAGGGGAACCTG |
| <i>E. fergusonii</i> | 1441 | TTAACCTTCGGGAGGGCGCTTACCACCTTTGTGATTCATGACTGGGGTGAAGTCGTAACAAGGTAACCGTAGGGGAACCTG |
| <i>E. hermannii</i>  | 1441 | TTAACCTTCGGGAGGGCGCTTACCACCTTTGTGATTCATGACTGGGGTGAAGTCGTAACAAGGTAACCGTAGGGGAACCTG |
| <i>E. marmotae</i>   | 1441 | TTAACCTTCGGGAGGGCGCTTACCACCTTTGTGATTCATGACTGGGGTGAAGTCGTAACAAGGTAACCGTAGGGGAACCTG |
| <i>E. ruysiae</i>    | 1441 | TTAACCTTCGGGAGGGCGCTTACCACCTTTGTGATTCATGACTGGGGTGAAGTCGTAACAAGGTAACCGTAGGGGAACCTG |
| Cryptic clade I      | 1441 | TTAACCTTCGGGAGGGCGCTTACCACCTTTGTGATTCATGACTGGGGTGAAGTCGTAACAAGGTAACCGTAGGGGAACCTG |
| Cryptic clade II     | 1441 | TTAACCTTCGGGAGGGCGCTTACCACCTTTGTGATTCATGACTGGGGTGAAGTCGTAACAAGGTAACCGTAGGGGAACCTG |
| Cryptic clade III    | 1441 | TTAACCTTCGGGAGGGCGCTTACCACCTTTGTGATTCATGACTGGGGTGAAGTCGTAACAAGGTAACCGTAGGGGAACCTG |
| Cryptic clade VI     | 1441 | TTAACCTTCGGGAGGGCGCTTACCACCTTTGTGATTCATGACTGGGGTGAAGTCGTAACAAGGTAACCGTAGGGGAACCTG |
| <i>S. enterica</i>   | 1441 | TTAACCTTCGGGAGGGCGCTTACCACCTTTGTGATTCATGACTGGGGTGAAGTCGTAACAAGGTAACCGTAGGGGAACCTG |

|                      |      |                    |
|----------------------|------|--------------------|
| <i>E. albertii</i>   | 1521 | CGGTTGGATCACCTCCTT |
| <i>E. coli</i>       | 1521 | CGGTTGGATCACCTCCTT |
| <i>E. fergusonii</i> | 1521 | CGGTTGGATCACCTCCTT |
| <i>E. hermannii</i>  | 1521 | CGGTTGGATCACCTCCTT |
| <i>E. marmotae</i>   | 1521 | CGGTTGGATCACCTCCTT |
| <i>E. ruysiae</i>    | 1521 | CGGTTGGATCACCTCCTT |
| Cryptic clade I      | 1521 | CGGTTGGATCACCTCCTT |
| Cryptic clade II     | 1521 | CGGTTGGATCACCTCCTT |
| Cryptic clade III    | 1521 | CGGTTGGATCACCTCCTT |
| Cryptic clade VI     | 1521 | CGGTTGGATCACCTCCTT |
| <i>S. enterica</i>   | 1521 | CGGTTGGATCACCTCCTT |
